# Supplementary material for: Significantly enhanced dewatering performance of drinking water sludge from a coagulation process using a novel chitosan–aluminum chloride composite coagulant in the treatment of cyanobacteria-laden source water
Source: Royal Society of Chemistry journal article supplement (doi:10.1039/c6ra11989a), 2016-01-01
Supplement: c6ra11989a1.pdf [file c6ra11989a1.pdf]

Supplementary Information for:

**Significantly enhanced dewatering performance of drinking water sludge from coagulation process using a novel chitosan-aluminum chloride composite coagulant in treatment of cyanobacteria-laden source water**

*Chunxia Ma<sup>a</sup>, Haiyan Pei<sup>a, b, \*</sup>, Wenrong Hu<sup>a, b</sup>, Juan Cheng<sup>a</sup>, Hangzhou Xu<sup>a</sup>, Yan Jin<sup>a</sup>*

<sup>a</sup> School of Environmental Science and Engineering, Shandong University, Jinan 250100, China.

<sup>b</sup> Shandong Provincial Engineering Center on Environmental Science and Technology, Jinan, China.

**\*Corresponding Author:**

Haiyan Pei

School of Environmental Science and Engineering, Shandong University,

Jinan 250100, P. R. China

Phone/Fax: +86-531-88392983

Email: haiyanhup@126.com

**Supplementary Data**

Number of pages: 2

Number of figures: 1

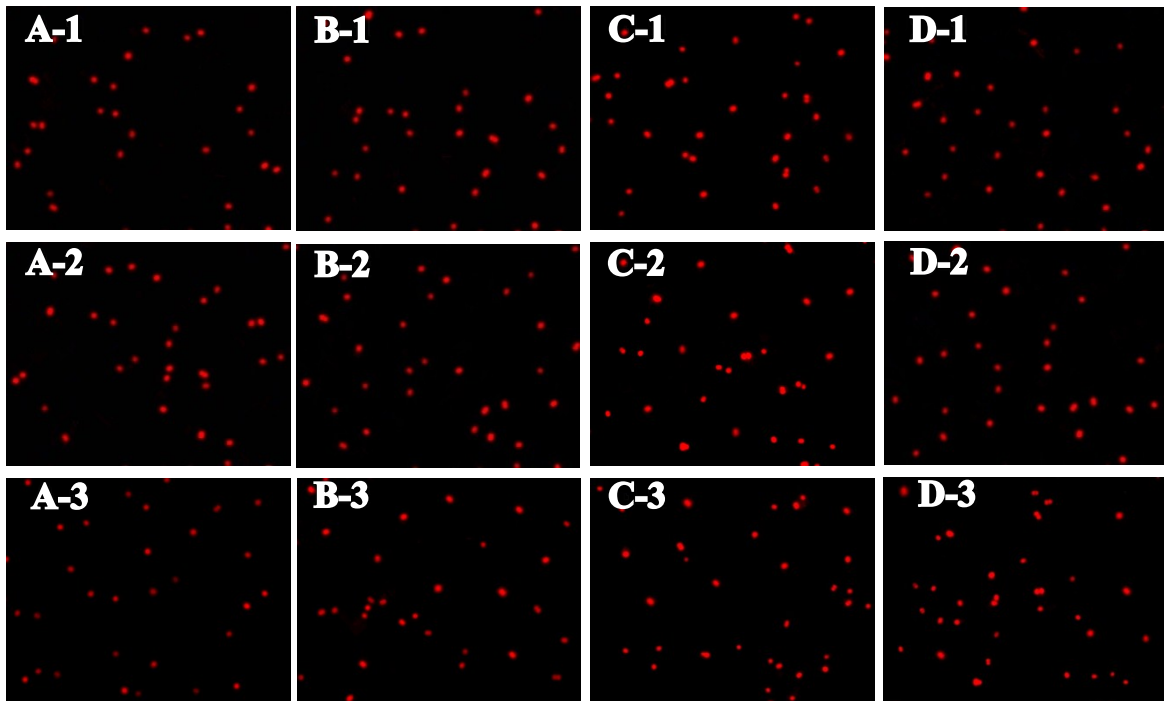

**Fig. S1.** Cell viability of (A) raw *Microcystis aeruginosa* (*M.A*) suspension and (B) cyanobacteria-laden AC sludge, (C) CTS sludge and (D) CTSAC sludge samples before (1) and after filtration at -0.5 Bar (2), filtrate -0.9 Bar (3). Algae cell density:  $2 \times 10^6$  cells/mL.
